# Supplementary material for: Temporo-parietal cortex involved in modeling one’s own and others’ attention
Source: eLife. 2021 Feb 15;10:e63551. doi: 10.7554/eLife.63551 (PMC7884070; doi:10.7554/eLife.63551)
Supplement: Supplementary file 6. — List of all of the stories and story versions (endogenous-self, exogenous-self, endogenous-other, and exogenous-other) presented to the participants during the experiment. Story #1–80 are the social stories, and #81–100 are the nonsocial control stories. [file elife-63551-supp6.xlsx]

## Sheet: Stories
Story #	Endogenous-self	Exogenous-self	Endogenous-other	Exogenous-other	Probe (self version)	Probe (other version)	Probe true (1) or false (0)
1	You are in the closet in your bedroom, where there is a rack of shirts. You are trying to find the bright green shirt with the red stars.	You are in the closet in your bedroom, where there is a rack of shirts. Your attention is captured by a bright green shirt with red stars.	Adam is in the closet in his bedroom, where there is a rack of shirts. He is trying to find the bright green shirt with the red stars.	Adam is in the closet in his bedroom, where there is a rack of shirts. His attention is captured by a bright green shirt with red stars.	You are inside a closet.	Adam is inside a closet.	1
2	You are at a pond along a hiking trail in the woods. You are trying to find the bright orange frog with blue spots.	You are at a pond along a hiking trail in the woods. Your eyes are drawn to a bright orange frog with blue spots.	Andrew is at a pond along a hiking trail in the woods. He is trying to find the bright orange frog with blue spots.	Andrew is at a pond along a hiking trail in the woods. His eyes are drawn to a bright orange frog with blue spots.	You are in the woods.	Andrew is in the woods.	1
3	It is a bright day in the park. You are trying to find the ball in the grass.	It is a bright day in the park. Your attention is captured by a ball in the grass.	It is a bright day in the park. Ben is trying to find the ball in the grass.	It is a bright day in the park. Ben's attention is captured by a ball in the grass.	You are in a park.	Ben is in a park.	1
4	You are at the produce section of a grocery store. You are looking diligently for the stand of bright mandarin oranges.	You are at the produce section of a grocery store. Your attention is captured by a stand of bright mandarin oranges.	Bill is at the produce section of a grocery store. He is looking diligently for the stand of bright mandarin oranges.	Bill is at the produce section of a grocery store. His attention is captured by a stand of bright mandarin oranges.	You are in a grocery store.	Bill is in a grocery store.	1
5	You are in the stacks of the library. You are trying to find the leatherbound book with glimmering gold letters on it.	You are in the stacks of the library. The glimmer of gold letters on a leatherbound book catches your eyes.	Brandon is in the stacks of the library. He is trying to find the leatherbound book with glimmering gold letters on it.	Brandon is in the stacks of the library. The glimmer of gold letters on a leatherbound book catches his eyes.	You are in a library.	Brandon is in a library.	1
6	You are in a shopping mall, and there are numerous store windows with different items. You are trying to spot that bright yellow raincoat.	You are in a shopping mall, and there are numerous store windows with different items. Your attention is captured by a bright yellow raincoat.	Brian is in a shopping mall, and there are numerous store windows with different items. He is trying to spot that bright yellow raincoat.	Brian is in a shopping mall, and there are numerous store windows with different items. His attention is captured by a bright yellow raincoat.	You are in a shopping mall.	Brian is in a shopping mall.	1
7	You are camping in the woods, and there are several lush trees around your campsite. You are trying to spot the flutter of the red-bellied woodpecker in the canopy.	You are camping in the woods, and there are several lush trees around your campsite. The flutter of a red-bellied woodpecker in the canopy catches your gaze.	Bruce is camping in the woods, and there are several lush trees around his campsite. He is trying to spot the flutter of the red-bellied woodpecker in the canopy.	Bruce is camping in the woods, and there are several lush trees around his campsite. The flutter of a red-bellied woodpecker in the canopy catches his gaze.	You are in the woods.	Bruce is in the woods.	1
8	You are in the arcade, and there is a wide selection of games available. You are trying to find the bright yellow Pac-Man machine.	You are in the arcade, and there is a wide selection of games available. Your attention is captured by a bright yellow Pac-Man machine.	Charlie is in the arcade, and there is a wide selection of games available. He is trying to find the bright yellow Pac-Man machine.	Charlie is in the arcade, and there is a wide selection of games available. His attention is captured by a bright yellow Pac-Man machine.	You are in an arcade.	Charlie is in an arcade.	1
9	You are in your office, and your desk is very messy. You are trying to find the red stapler among the items.	You are in your office, and your desk is very messy. Your attention is captured by a red stapler among the items.	Daniel is in his office, and his desk is very messy. He is trying to find the red stapler among the items.	Daniel is in his office, and his desk is very messy. His attention is captured by a red stapler among the items.	You are in an office.	Daniel is in an office.	1
10	You are at a car dealer, and the parking lot is full of new cars. You are trying to find that red Ferrari sportscar.	You are at a car dealer, and the parking lot is full of new cars. Your eyes are drawn to a red Ferrari sportscar.	David is at a car dealer, and the parking lot is full of new cars. He is trying to find that red Ferrari sports car.	David is at a car dealer, and the parking lot is full of new cars. His eyes are drawn to a red Ferrari sports car.	You are at a car dealer.	David is at a car dealer.	1
11	You are on a street, and there is a parade passing by with people dressed up as superheroes. You are searching attentively for the giant green Incredible Hulk.	You are on a street, and there is a parade passing by with people dressed up as superheroes. Your eyes are drawn to a giant green Incredible Hulk.	Alice is on a street, and there is a parade passing by with people dressed up as superheroes. She is searching attentively for the giant green Incredible Hulk.	Alice is on a street, and there is a parade passing by with people dressed up as superheroes. Her eyes are drawn to a giant green Incredible Hulk.	You are on a street.	Alice is on a street.	1
12	You are in a bank office. You attentively look around searching for the blinking red lights from security cameras in the ceiling.	You are in a bank office. Your attention is captured by a blinking red light from a security camera in the ceiling.	Amanda is in a bank office. She attentively looks around searching for the blinking red lights from security cameras in the ceiling.	Amanda is in a bank office. Her attention is captured by a blinking red light from a security camera in the ceiling.	You are in a bank office.	Amanda is in a bank office.	1
13	You are in a coral reef with clear waters full of fish. You are searching attentively for an orange-white striped Clownfish.	You are in a coral reef with clear waters full of fish. Your gaze is captured by an orange-white striped Clownfish.	Amber is in a coral reef with clear waters full of fish. She is searching attentively for an orange-white striped clownfish.	Amber is in a coral reef with clear waters full of fish. Her gaze is captured by an orange-white striped clownfish.	You are in a coral reef.	Amber is in a coral reef.	1
14	You are in the elevator of a skyscraper. You are searching attentively for the button indicating the ground level.	You are in the elevator of a skyscraper. Your eyes are drawn to the button indicating the ground level.	Amy is in the elevator of a skyscraper. She is searching attentively for the button indicating the ground level.	Amy is in the elevator of a skyscraper. Her eyes are drawn to the button indicating the ground level.	You are in the elevator of a skyscraper.	Amy is in the elevator of a skyscraper.	1
15	You are at a busy streetside cafe, and many people walk by. You are searching attentively for your friend's face among them.	You are at a busy streetside cafe, and many people walk by. Your attention is captured by your friend's face among them.	Angela is at a busy streetside cafe, and many people walk by. She is searching attentively for her friend's face among them.	Angela is at a busy streetside cafe, and many people walk by. Her attention is captured by her friend's face among them.	You are at a streetside cafe.	Angela is at a streetside cafe.	1
16	You are in a grocery store at the candy section. You are searching attentively for the bright orange packages of Reece’s peanut butter cups.	You are in a grocery store at the candy section. Your eyes are drawn to the bright orange packages of Reece’s peanut butter cups.	Ann is in a grocery store at the candy section. She is searching attentively for the bright orange packages of Reese’s peanut butter cups.	Ann is in a grocery store at the candy section. Her eyes are drawn to the bright orange packages of Reese’s peanut butter cups.	You are in a grocery store.	Ann is in a grocery store.	1
17	You are in the grocery store at the freezer section. You are searching attentively for the red popsicles.	You are in the grocery store at the freezer section. Your eyes are drawn to the red popsicles.	Anna is in the grocery store at the freezer section. She is searching attentively for the red popsicles.	Anna is in the grocery store at the freezer section. Her eyes are drawn to the red popsicles.	You are in a grocery store.	Anna is in a grocery store.	1
18	You are at the monkey cage at a zoo. You are searching for the monkey who lacks one arm.	You are at the monkey cage at a zoo. Your attention is captured by a monkey lacking one arm.	Ashley is at the monkey cage at a zoo. She is searching for the monkey who lacks one arm.	Ashley is at the monkey cage at a zoo. Her attention is captured by a monkey lacking one arm.	You are at the zoo.	Ashley is at the zoo.	1
19	You are on a safari trip in Kenya, and there is an elephant herd close to the jeep. You are trying to spot the white albino elephant.	You are on a safari trip in Kenya, and there is an elephant herd close to the jeep. Your eyes are drawn to a white albino elephant.	Carol is on a safari trip in Kenya, and there is an elephant herd close to the jeep. She is trying to spot the white albino elephant.	Carol is on a safari trip in Kenya, and there is an elephant herd close to the jeep. Her eyes are drawn to a white albino elephant.	You are in Kenya.	Carol is in Kenya.	1
20	You are outside a newly built public library, and there are hundreds of small round windows. You are searching attentively for the window that's broken.	You are outside a newly built public library, and there are hundreds of small round windows. Your attention is drawn to a window that's broken.	Carolyn is outside a newly built public library, and there are hundreds of small round windows. She is searching attentively for the window that's broken.	Carolyn is outside a newly built public library, and there are hundreds of small round windows. Her attention is drawn to a window that's broken.	You are outside a library.	Carolyn is outside a library.	1
21	You are in your pantry, which is filled with shelves of food. You are attentively looking for the bright cereal box.	You are in your pantry, which is filled with shelves of food. Your eyes are drawn to a bright cereal box.	Eric is in his pantry, which is filled with shelves of food. He is attentively looking for the bright cereal box.	Eric is in his pantry, which is filled with shelves of food. His eyes are drawn to a bright cereal box.	You are at a post office.	Eric is at a post office.	0
22	It is a windy day at the beach. You are trying to find the gold ring in the sand.	It is a windy day at the beach. A gold ring in the sand catches your attention.	It is a windy day at the beach. Frank is trying to find the gold ring in the sand.	It is a windy day at the beach. A gold ring in the sand catches Frank's attention.	You are in the woods.	Frank is in the woods.	0
23	You are at a casino, and there are many colorful games. You are attentively looking for that bright red slot machine.	You are at a casino, and there are many colorful games. A bright red slot machine catches your eyes.	George is at a casino, and there are many colorful games. He is attentively looking for that bright red slot machine.	George is at a casino, and there are many colorful games. A bright red slot machine catches his eyes.	You are at a football stadium.	George is at a football stadium.	0
24	You are at a coffee shop, and there is a case full of pastries. You are trying to find the chocolate croissants.	You are at a coffee shop, and there is a case full of pastries. Your attention is captured by some chocolate croissants.	Greg is at a coffee shop, and there is a case full of pastries. He is trying to find the chocolate croissants.	Greg is at a coffee shop, and there is a case full of pastries. His attention is captured by some chocolate croissants.	You are in a grocery store.	Greg is in a grocery store.	0
25	You are at a bar, and there are several bottles lining the wall. You are trying to find the bright blue Vodka bottle.	You are at a bar, and there are several bottles lining the wall. Your eyes are drawn to a bright blue Vodka bottle.	Harry is at a bar, and there are several bottles lining the wall. He is trying to find the bright blue vodka bottle.	Harry is at a bar, and there are several bottles lining the wall. His eyes are drawn to a bright blue vodka bottle.	You are in a bank.	Harry is in a bank.	0
26	You are in a flower shop, and one of the walls is full of different flowers. You are attentively looking for the bright red roses.	You are in a flower shop, and one of the walls is full of different flowers. Your attention is captured by some bright red roses.	Henry is in a flower shop, and one of the walls is full of different flowers. He is attentively looking for the bright red roses.	Henry is in a flower shop, and one of the walls is full of different flowers. His attention is captured by some bright red roses.	You are at a coffee shop.	Henry is at a coffee shop.	0
27	You are in a candy store, and there is a rack with different types of candy. You are trying to find the multi-colored gumdrops.	You are in a candy store, and there is a rack with different types of candy. Your attention is caught by some multi-colored gumdrops.	Jack is in a candy store, and there is a rack with different types of candy. He is trying to find the multi-colored gumdrops.	Jack is in a candy store, and there is a rack with different types of candy. His attention is caught by some multi-colored gumdrops.	You are in a furniture store.	Jack is in a furniture store.	0
28	You are at the veterinary office, and there is a shelf full of supplies. You are trying to find a bright red dog leash.	You are at the veterinary office, and there is a shelf full of supplies. Your gaze is captured by a bright red dog leash.	Jacob is at the veterinary office, and there is a shelf full of supplies. He is trying to find a bright red dog leash.	Jacob is at the veterinary office, and there is a shelf full of supplies. His gaze is captured by a bright red dog leash.	You are at the dentist.	Jacob is at the dentist.	0
29	You are in the waiting room at the dentist, and there is a table covered with magazines. You are attentively looking for the one with the bright red hang glider on the cover.	You are in the waiting room at the dentist, and there is a table covered with magazines. Your eyes are drawn to the one with the bright red hang glider on the cover.	James is in the waiting room at the dentist, and there is a table covered with magazines. He is attentively looking for the one with the bright red hang glider on the cover.	James is in the waiting room at the dentist, and there is a table covered with magazines. His eyes are drawn to the one with the bright red hang glider on the cover.	You are at a train station.	James is at a train station.	0
30	You are in a store that sells lamps. You are trying to find that bright disco light that changes colors.	You are in a store that sells lamps. Your gaze is drawn to a bright disco light that changes colors.	Jason is in a store that sells lamps. He is trying to find that bright disco light that changes colors.	Jason is in a store that sells lamps. His gaze is drawn to a bright disco light that changes colors.	You are at a car dealer.	Jason is at a car dealer.	0
31	You are in a carpet store, and there is a wall full of Persian rugs. You are searching attentively for the glittering Persian rug in gold.	You are in a carpet store, and there is a wall full of Persian rugs. Your attention is caught by a glittering Persian rug in gold.	Diane is in a carpet store, and there is a wall full of Persian rugs. She is searching attentively for the glittering Persian rug in gold.	Diane is in a carpet store, and there is a wall full of Persian rugs. Her attention is caught by a glittering Persian rug in gold.	You are in a paint store.	Diane is in a paint store.	0
32	You are in an airport control tower, and the tarmac below is full of airplanes. You are trying to spot the EasyJet flight.	You are in an airport control tower, and the tarmac below is full of airplanes. Your eyes are drawn to the EasyJet flight.	Emily is in an airport control tower, and the tarmac below is full of airplanes. She is trying to spot the EasyJet flight.	Emily is in an airport control tower, and the tarmac below is full of airplanes. Her eyes are drawn to the EasyJet flight.	You are in a train station.	Emily is in a train station.	0
33	You are in a crowded subway car. You attentively look around at the walls trying to find the red emergency break.	You are in a crowded subway car. Your eyes are automatically drawn to a red emergency break on the wall.	Emma is in a crowded subway car. She attentively looks around at the walls trying to find the red emergency break.	Emma is in a crowded subway car. Her eyes are automatically drawn to a red emergency break on the wall.	You are on a bus.	Emma is on a bus.	0
34	You are walking through a botanical garden. You are trying to spot the magnificent cherry blossom tree in full bloom.	You are walking through a botanical garden. Your attention is caught by a magnificent cherry blossom tree in full bloom.	Heather is walking through a botanical garden. She is trying to spot the magnificent cherry blossom tree in full bloom.	Heather is walking through a botanical garden. Her attention is caught by a magnificent cherry blossom tree in full bloom.	You are in an amusement park.	Heather is in an amusement park.	0
35	You are outside the airport, and there is a long line of taxi drivers holding signs. You are searching attentively for the sign with your name on it.	You are outside the airport, and there is a long line of taxi drivers holding signs. Your attention is grabbed by a sign with your name on it.	Jane is outside the airport, and there is a long line of taxi drivers holding signs. She is searching attentively for the sign with her name on it.	Jane is outside the airport, and there is a long line of taxi drivers holding signs. Her attention is grabbed by a sign with her name on it.	You are outside the museum.	Jane is outside the museum.	0
36	You are at an Indian restaurant, and there is a long menu of items. You are searching attentively for the one with a giant chili symbol next to it.	You are at an Indian restaurant, and there is a long menu of items. Your eyes are automatically drawn to one with a giant chili symbol next to it.	Janet is at an Indian restaurant, and there is a long menu of items. She is searching attentively for the one with a giant chili symbol next to it.	Janet is at an Indian restaurant, and there is a long menu of items. Her eyes are automatically drawn to one with a giant chili symbol next to it.	You are at a Chinese restaurant.	Janet is at a Chinese restaurant.	0
37	You are on a busy street, and there are a lot of vehicles. You are searching attentively for your friend's bright yellow motorcycle among them.	You are on a busy street, and there are a lot of vehicles. Your attention is captured by your friend's bright yellow motorcycle among them.	Jennifer is on a busy street, and there are a lot of vehicles. She is searching attentively for her friend's bright yellow motorcycle among them.	Jennifer is on a busy street, and there are a lot of vehicles. Her attention is captured by her friend's bright yellow motorcycle among them.	You are on a busy train platform.	Jennifer is on a busy train platform.	0
38	You are in China, on a safari in the jungle. You are searching attentively for the white tiger among the trees.	You are in China, on a safari in the jungle. Your attention is captured by a white tiger among the trees.	Jessica is in China, on a safari in the jungle. She is searching attentively for the white tiger among the trees.	Jessica is in China, on a safari in the jungle. Her attention is captured by a white tiger among the trees.	You are in Italy.	Jessica is in Italy.	0
39	You are in a baseball stadium, and it is full of people. You are searching attentively for your friend.	You are in a baseball stadium, and it is full of people. You suddenly notice your friend is present.	Julia is in a baseball stadium, and it is full of people. She is searching attentively for her friend.	Julia is in a baseball stadium, and it is full of people. She suddenly notices her friend is present.	You are at a hockey rink.	Julia is at a hockey rink.	0
40	You are at a shoe store, and one of the walls is full of sneakers. You are trying to find that pair of bright white Nike sneakers with a red logo.	You are at a shoe store, and one of the walls is full of sneakers. Your eyes are drawn to a pair of bright white Nike sneakers with a red logo.	Sally is at a shoe store, and one of the walls is full of sneakers. She is trying to find that pair of bright white Nike sneakers with a red logo.	Sally is at a shoe store, and one of the walls is full of sneakers. Her eyes are drawn to a pair of bright white Nike sneakers with a red logo.	You are at a flower store.	Sally is at a flower store.	0
41	You are at the post office, and there is a shelf full of stamps. You are trying to find the bright blue Harry Potter stamps.	You are at the post office, and there is a shelf full of stamps. Your attention is drawn to some bright blue Harry Potter stamps.	Jerry is at the post office, and there is a shelf full of stamps. He is trying to find the bright blue Harry Potter stamps.	Jerry is at the post office, and there is a shelf full of stamp. His attention is drawn to some bright blue Harry Potter stamps.	The stamps are bright blue.	The stamps are bright blue.	1
42	You are at the train station. You are attentively looking for the track with the bright white bullet train.	You are at the train station. Your attention is drawn to the bright white bullet train on one of the tracks.	Joe is at the train station. He is attentively looking for the track with the bright white bullet train.	Joe is at the train station. His attention is drawn to the bright white bullet train on one of the tracks.	The train is bright white bullet train.	The train is bright white bullet train.	1
43	You are at the carnival, and there are crowds of people in movement. You are attentively looking for that person in green and yellow costume in the crowd.	You are at the carnival, and there are crowds of people in movement. Your attention is drawn to a person in green and yellow costume in the crowd.	John is at the carnival, and there are crowds of people in movement. He is attentively looking for that person in a green and yellow costume in the crowd.	John is at the carnival, and there are crowds of people in movement. His attention is drawn to a person in a green and yellow costume in the crowd.	The costume is green and yellow.	The costume is green and yellow.	1
44	You are at a soccer game on a hot summer day. You are attentively looking for the bright yellow shirt of the drink vendor.	You are at a soccer game on a hot summer day. Your attention is captured by the bright yellow shirt of a drink vendor.	Jose is at a soccer game on a hot summer day. He is attentively looking for the bright yellow shirt of the drink vendor.	Jose is at a soccer game on a hot summer day. His attention is captured by the bright yellow shirt of a drink vendor.	The vender is selling drinks.	The vender is selling drinks.	1
45	You are in your bedroom, and there are clothes all over the floor. You are trying to find that bright red sweater among the clothes.	You are in your bedroom, and there are clothes all over the floor. Your attention is caught by a bright red sweater among the clothes.	Justin is in his bedroom, and there are clothes all over the floor. He is trying to find that bright red sweater among the clothes.	Justin is in his bedroom, and his are clothes all over the floor. His attention is caught by a bright red sweater among the clothes.	The piece of clothing is a bright red sweater.	The piece of clothing is a bright red sweater.	1
46	You are at your messy desk, which is covered with pens and office supplies. You are trying to find your yellow highlighter among the items.	You are at your messy desk, which is covered with pens and office supplies. Your eyes are drawn to a yellow highlighter among the items.	Kevin is at his messy desk, which is covered with pens and office supplies. He is trying to find his yellow highlighter among the items.	Kevin is at his messy desk, which is covered with pens and office supplies. His eyes are drawn to a yellow highlighter among the items.	The item on the desk is a yellow highlighter.	The item on the desk is a yellow highlighter.	1
47	You are at an animal shelter, where there are many cats and dogs in cages. You are attentively looking for the large white poodle.	You are at an animal shelter, where there are many cats and dogs in cages. Your gaze is drawn to a large white poodle.	Larry is at an animal shelter, where there are many cats and dogs in cages. He is attentively looking for the large white poodle.	Larry is at an animal shelter, where there are many cats and dogs in cages. His gaze is drawn to a large white poodle.	The animal is a large white poodle.	The animal is a large white poodle.	1
48	You are at a county fair and one booth has a collection of many pies. You are trying to find a strawberry pie.	You are at a county fair and one booth has a collection of many pies. Your attention is caught by a strawberry pie.	Mark is at a county fair and one booth has a collection of many pies. He is trying to find a strawberry pie.	Mark is at a county fair and one booth has a collection of many pies. His attention is caught by a strawberry pie.	The food is a strawberry pie.	The food is a strawberry pie.	1
49	You are at your birthday party, and there is a table with a pile of gifts. You are attentively looking for the bright polka dotted box that your mom gave you.	You are at your birthday party, and there is a table with a pile of gifts. Your attention is captured by the bright polka dotted box that your mom gave you.	Michael is at his birthday party, and there is a table with a pile of gifts. He is attentively looking for the bright polka dotted box that his mom gave him.	Michael is at his birthday party, and there is a table with a pile of gifts. His attention is captured by the bright polka dotted box that his mom gave him.	The gift is in a bright polka dotted box.	The gift is in a bright polka dotted box.	1
50	You are in your kitchen. You are trying to find that shiny butcher's knife.	You are in your kitchen. Your eyes are drawn to the shiny butcher's knife.	Paul is in his kitchen. He is trying to find that shiny butcher's knife.	Paul is in his kitchen. His eyes are drawn to the shiny butcher's knife.	The kitchen utensil is a butcher's knife.	The kitchen utensil is a butcher's knife.	1
51	You are at an airshow, and there are 15 planes in the sky. You are trying to find the red-painted one.	You are at an airshow, and there are 15 planes in the sky. Your attention is captured by a red-painted one.	Karen is at an airshow, and there are 15 planes in the sky. She is trying to find the red-painted one.	Karen is at an airshow, and there are 15 planes in the sky. Her attention is captured by a red-painted one.	The plane is red.	The plane is red.	1
52	You are at an animal shelter, and there is a wall full of cages. You are searching attentively for the large German Shepherd with a white spot on its forehead.	You are at an animal shelter, and there is a wall full of cages. Your gaze is drawn to a large German Shepherd with a white spot on its forehead.	Kelly is at an animal shelter, and there is a wall full of cages. She is searching attentively for the large German Shepherd with a white spot on its forehead.	Kelly is at an animal shelter, and there is a wall full of cages. Her gaze is drawn to a large German Shepherd with a white spot on its forehead.	The German Shepherd has a white spot.	The German Shepherd has a white spot.	1
53	You are in the grand exhibition hall in an Egyptian museum. You are attentively looking around trying to find the mummy with the golden mask.	You are in the grand exhibition hall in an Egyptian museum. Your gaze is automatically drawn to a mummy with a golden mask.	Laura is in the grand exhibition hall in an Egyptian museum. She is attentively looking around trying to find the mummy with the golden mask.	Laura is in the grand exhibition hall in an Egyptian museum. Her gaze is automatically drawn to a mummy with a golden mask.	The mask is gold.	The mask is gold.	1
54	You are sitting in a movie theater, and the room is dark. You look around trying to find the brightly lit red sign indicating the fire exit.	You are sitting in a movie theatre, and the room is dark. Your attention is automatically drawn to the brightly lit red sign indicating the fire exit.	Linda is sitting in a movie theater, and the room is dark. She looks around trying to find the brightly lit red sign indicating the fire exit.	Linda is sitting in a movie theatre, and the room is dark. Her attention is automatically drawn to the brightly lit red sign indicating the fire exit.	The exit sign is red.	The exit sign is red.	1
55	Your phone is in your hand. You are searching for the purple Lyft app icon.	Your phone is in your hand. Your eyes are drawn to the purple Lyft icon.	Lisa's phone is in her hand. She is searching for the purple Lyft app icon.	Lisa's phone is in her hand. Her eyes are drawn to the purple Lyft app icon.	The app icon is Lyft.	The app icon is Lyft.	1
56	You are in an art gallery, and there is a wall full of paintings. You are searching attentively for the Van Gogh sunflower.	You are in an art gallery, and there is a wall full of paintings. Your eyes are automatically drawn to the Van Gogh sunflower.	Maria is in an art gallery, and there is a wall full of paintings. She is searching attentively for the Van Gogh sunflower.	Maria is in an art gallery, and there is a wall full of paintings. Her eyes are automatically drawn to the Van Gogh sunflower.	The Van Gogh painting has sunflowers.	The Van Gogh painting has sunflowers.	1
57	You are at the aquarium, and there is a big tank full of fish. You are trying to find the great white shark.	You are at the aquarium, and there is a big tank full of fish. Your eyes are drawn to the great white shark.	Mary is at the aquarium, and there is a big tank full of fish. She is trying to find the great white shark.	Mary is at the aquarium, and there is a big tank full of fish. Her eyes are drawn to the great white shark.	The fish is a great white shark.	The fish is a great white shark.	1
58	You are at the gym, and there is a rack of dumbbells. You are trying to find the large dumbbell weighing 100 lbs.	You are at the gym, and there is a rack of dumbbells. Your eyes are drawn to a large dumbbell weighing 100 lbs.	Michelle is at the gym, and there is a rack of dumbbells. She is trying to find the large dumbbell weighing 100 lbs.	Michelle is at the gym, and there is a rack of dumbbells. Her eyes are drawn to a large dumbbell weighing 100 lbs.	The dumbbell weighs 100 lbs.	The dumbbell weighs 100 lbs.	1
59	You are in a stable for horses. You are searching attentively for the large white horse.	You are in a stable for horses. Your attention is captured by a large white horse.	Nancy is in a stable for horses. She is searching attentively for the large white horse.	Nancy is in a stable for horses. Her attention is captured by a large white horse.	The horse is white.	The horse is white.	1
60	You are in the main exhibition hall of a modern art museum. You are looking attentively for that huge Pollock painting that looks like a spiderweb.	You are in the main exhibition hall of a modern art museum. Your attention is captured by a huge Pollock painting that looks like a spiderweb.	Natalie is in the main exhibition hall of a modern art museum. She is looking attentively for that huge Pollock painting that looks like a spiderweb.	Natalie is in the main exhibition hall of a modern art museum. Her attention is captured by a huge Pollock painting that looks like a spiderweb.	The piece of art is a Pollock painting.	The piece of art is a Pollock painting.	1
61	You are at a construction site, and there is equipment all over the floor. You are attentively looking for the extra large hand saw among the items.	You are at a construction site, and there is equipment all over the floor. Your eyes are drawn to a extra large hand saw among the items.	Peter is at a construction site, and there is equipment all over the floor. He is attentively looking for the extra large hand saw among the items.	Peter is at a construction site, and there is equipment all over the floor. His eyes are drawn to a extra large hand saw among the items.	The tool is a hammer.	The tool is a hammer.	0
62	It is a foggy day, and you are in an old cemetery. You are trying to find the headstone with a red rose left on it.	It is a foggy day, and you are in an old cemetery. Your attention is caught by a red rose left on one of the headstones.	It is a foggy day, and Ray is in an old cemetery. He is trying to find the headstone with a red rose left on it.	It is a foggy day, and Ray is in an old cemetery. His attention is caught by a red rose left on one of the headstones.	The flower left on the headstone is a tulip.	The flower left on the headstone is a tulip.	0
63	You are in a grand cathedral with a gorgeous painted glass window. You are searching attentively for the bright yellow star representing the Star of Wonder.	You are in a grand cathedral with a gorgeous painted glass window. Your eyes are drawn to a bright yellow star representing the Star of Wonder.	Richard is in a grand cathedral with a gorgeous painted glass window. He is searching attentively for the bright yellow star representing the Star of Wonder.	Richard is in a grand cathedral with a gorgeous painted glass window. His eyes are drawn to a bright yellow star representing the Star of Wonder.	The shape in the stained glass window is a heart.	The shape in the stained glass window is a heart.	0
64	You are at a boat show filled with vessels of all shapes and sizes. You are searching attentively for the black yacht with a golden mermaid statue in front.	You are at a boat show filled with vessels of all shapes and sizes. Your gaze is drawn to a black yacht with a golden mermaid statue in front.	Robert is at a boat show filled with vessels of all shapes and sizes. He is searching attentively for the black yacht with a golden mermaid statue in front.	Robert is at a boat show filled with vessels of all shapes and sizes. His gaze is drawn to a black yacht with a golden mermaid statue in front.	The yacht has a seahorse in front.	The yacht has a seahorse in front.	0
65	You are at a playground filled with young kids playing on the jungle gym. You are searching attentively for the boy with long curly red hair.	You are at a playground filled with young kids playing on the jungle gym. Your gaze is automatically drawn to a boy with long curly red hair.	Ryan is at a playground filled with young kids playing on the jungle gym. He is searching attentively for the boy with long curly red hair.	Ryan is at a playground filled with young kids playing on the jungle gym. His gaze is automatically drawn to a boy with long curly red hair.	The boy has large curly black hair.	The boy has long curly black hair.	0
66	You are at the beach, where a group of kids are flying kites. You are searching attentively for the bright green dragon-shaped kite.	You are at the beach, where a group of kids are flying kites. Your attention is captured by a bright green dragon-shaped kite.	Albert is at the beach, where a group of kids are flying kites. He is searching attentively for the bright green dragon-shaped kite.	Albert is at the beach, where a group of kids are flying kites. His attention is captured by a bright green dragon-shaped kite.	The kite is shaped like a carp.	The kite is shaped like a carp.	0
67	You are on a cruise in the waters just outside of Alaska. You are trying to spot the killer whale when it breaches the surface.	You are on a cruise in the waters just outside of Alaska. Your attention is captured by a killer whale when it breaches the surface.	Scott is on a cruise in the waters just outside of Alaska. He is trying to spot the killer whale when it breaches the surface.	Scott is on a cruise in the waters just outside of Alaska. His attention is captured by a killer whale when it breaches the surface.	The animal is a pelican.	The animal is a pelican.	0
68	You are out in an open field, where hundreds of hot-air balloons go down for landing. You are searching attentively for the bright green one with a red star.	You are out in an open field, where hundreds of hot-air balloons go down for landing. Your eyes are drawn to a bright green one with a red star.	Steven is out in an open field, where hundreds of hot-air balloons go down for landing. He is searching attentively for the bright green one with a red star.	Steven is out in an open field, where hundreds of hot-air balloons go down for landing. His eyes are drawn to a bright green one with a red star.	The hot air balloon has green and red diagonal stripes.	The hot air balloon has green and red diagonal stripes.	0
69	You are driving your car on a busy street. You look attentively in the back mirror searching for that fire engine.	You are driving your car on a busy street. Your attention is captured by a fire engine in the back mirror.	Tyler is driving his car on a busy street. He looks attentively in the back mirror searching for that fire engine.	Tyler is driving his car on a busy street. His attention is captured by a fire engine in the back mirror.	The vehicle mentioned in the story is a school bus.	The vehicle mentioned in the story is a school bus.	0
70	You are in a bike shop, and numerous bikes hang on one of the walls. You are attentively looking for that red Italian sports bike.	You are in a bike shop, and numerous bikes hang on one of the walls. Your attention is caught by a red Italian sports bike.	Thomas is in a bike shop, and numerous bikes hang on one of the walls. He is attentively looking for that red Italian sports bike.	Thomas is in a bike shop, and numerous bikes hang on one of the walls. His attention is caught by a red Italian sports bike.	The bike is red children's bike.	The bike is red children's bike.	0
71	You are in an amusement park, and there are many booths with different activities. You are searching attentively for the wheel of fortune.	You are in an amusement park, and there are many booths with different activities. Your attention is captured by the wheel of fortune.	Nicole is in an amusement park, and there are many booths with different activities. She is searching attentively for the wheel of fortune.	Nicole is in an amusement park, and there are many booths with different activities. Her attention is captured by the wheel of fortune.	The game is a dunk tank.	The game is a dunk tank.	0
72	You are at a department store, and there are many sweatshirts around you. You are searching attentively for the bright white one with golden letters.	You are at a department store, and there are many sweatshirts around you. Your attention is captured by a bright white one with golden letters.	Olivia is at a department store, and there are many sweatshirts around her. She is searching attentively for the bright white one with golden letters.	Olivia is at a department store, and there are many sweatshirts around her. Her attention is captured by a bright white one with golden letters.	The sweatshirt is red.	The sweatshirt is red.	0
73	You are at a food festival, and there are many different stands. You are trying to find the giant inflatable elephant that sits on top of the ice cream stand.	You are at a food festival, and there are many different stands. Your attention is caught by a giant inflatable elephant that sits on top of an ice cream stand.	Rachel is at a food festival, and there are many different stands. She is trying to find the giant inflatable elephant that sits on top of the ice cream stand.	Rachel is at a food festival, and there are many different stands. Her attention is caught by a giant inflatable elephant that sits on top of an ice cream stand.	The elephant is on top of a barn.	The elephant is on top of a barn.	0
74	You are standing on the curb, and there are many cars parked along the street. You are trying to find the yellow car.	You are standing on the curb, and there are many cars parked along the street. Your attention is captured by a yellow car.	Rebecca is standing on the curb, and there are many cars parked along the street. She is trying to find the yellow car.	Rebecca is standing on the curb, and there are many cars parked along the street. Her attention is captured by a yellow car.	The car is red.	The car is red.	0
75	You are in the mountains, and there are many sounds around you. You are attentively listening for the sound of thunder in the distance.	You are in the mountains, and there are many sounds around you. Your attention is captured by the sound of thunder in the distance.	Sandra is in the mountains, and there are many sounds around her. She is attentively listening for the sound of thunder in the distance.	Sandra is in the mountains, and there are many sounds around her. Her attention is captured by the sound of thunder in the distance.	The sound mentioned in the story is a fire engine siren.	The sound mentioned in the story is a fire engine siren.	0
76	You are at a concert, and your friend is playing Mozart's clarinet concerto. You are concentrating to hear if he is playing any false notes.	You are at a concert, and your friend is playing Mozart's clarinet concerto. Your attention is captured by him playing a false note.	Sarah is at a concert, and her friend is playing Mozart's clarinet concerto. She is concentrating to hear if he is playing any false notes.	Sarah is at a concert, and her friend is playing Mozart's clarinet concerto. Her attention is captured by him playing a false note.	The clarinet concerto is composed by Beethoven.	The clarinet concerto is composed by Beethoven.	0
77	You are at a crowded party, and there are many conversations going on in the room. You are trying to listen to a conversation in which your name is being mentioned.	You are at a crowded party, and there are many conversations going on in the room. Your attention is captured by a conversation in which your name is being mentioned.	Stacey is at a crowded party, and there are many conversations going on in the room. She is trying to listen to a conversation in which her name is being mentioned.	Stacey is at a crowded party, and there are many conversations going on in the room. Her attention is captured by a conversation in which her name is being mentioned.	The name mentioned in the story is your father's.	The name mentioned in the story is Stacey's father's.	0
78	You are on the top of the Empire State Building, and the view of Manhattan is clear. You are searching attentively for that skyscraper with a golden roof.	You are on the top of the Empire State Building, and the view of Manhattan is clear. Your eyes are drawn to a skyscraper with a golden roof.	Sharon is on the top of the Empire State Building, and the view of Manhattan is clear. She is searching attentively for that skyscraper with a golden roof.	Sharon is on the top of the Empire State Building, and the view of Manhattan is clear. Her eyes are drawn to a skyscraper with a golden roof.	The roof is blue.	The roof is blue.	0
79	You are in the desert. You are searching attentively for that small lake with palm trees around it.	You are in the desert. Your eyes are automatically drawn to a small lake with palm trees around it.	Shirley is in the desert. She is searching attentively for that small lake with palm trees around it.	Shirley is in the desert. Her eyes are automatically drawn to a small lake with palm trees around it.	The trees around the lake are pine trees.	The trees around the lake are pine trees.	0
80	You are at an NBA game, and it is halftime break. You are looking attentively for that mascot in a big red dinosaur costume.	You are at an NBA game, and it is halftime break. Your attention is captured by a mascot in a big red dinosaur costume.	Susan is at an NBA game, and it is halftime break. She is looking attentively for that mascot in a big red dinosaur costume.	Susan is at an NBA game, and it is halftime break. Her attention is captured by a mascot in a big red dinosaur costume.	The mascot is a big brown coyote.	The mascot is a big brown coyote.	0
81	It is a bright day in the park. A hidden camera, mounted to a tree, captures the image of a ball in the grass.				The camera is in the park.		1
82	In the library, in the stacks, on one of the shelves, a ray of sunlight hits a leatherbound book with glimmering gold letters on its cover.				The book is in the library.		1
83	In a shopping mall, in one of the many store windows, hangs a bright yellow raincoat. A spotlight is shining directly on the raincoat.				The spotlight is in a store window.		1
84	In a bike shop, on one of the walls, hangs numerous bikes. A bright spotlight is shining on a red Italian sports bike.				The Italian sports bike hangs on a wall.		1
85	At a casino, there are many colorful games and tables. A spotlight in the ceiling is shining on a bright red slot machine.				The slot machine is at a casino.		1
86	In a flower shop, one of the walls is full of different flowers. A spotlight in the ceiling is shining directly at some bright red roses.				The red roses are in a botanical garden.		0
87	In a waiting room at a dentist, a table is covered with magazines. The table lamp is shining on a magazine with a cover featuring a bright red hang glider.				The table lamp is at a hairdresser.		0
88	At a train station, there are trains on 12 of the tracks. A surveillence camera is filming the track with a bright white bullet train.				The surveillence camera is at an airport.		0
89	In a coral reef with clear waters full of fish, a ray of sunlight breaks through the water and shines on an orange and white striped clownfish.				The clownfish is in an aquarium.		0
90	At an NBA game, in the halftime break, a TV camera is locked on the mascot in a big red dinosaur costume.				The TV camera is at a music concert.		0
91	A camera system in an airport control tower automatically identifies airplanes on the tarmac below. It detects a plane and identifies it as an EasyJet flight.				The plane on the tarmac is an EasyJet flight.		1
92	There is a surveillance camera in a crowded subway car. It films one of the walls, on which there is a red emergency break.				The surveillance camera films the emergency brake.		1
93	A time lapse camera is mounted in a botanical garden. It is capturing a magnificent cherry blossom tree in full bloom.				The time lapse camera is capturing a cherry blossom tree.		1
94	At an airshow, there are 15 planes in the sky. A ground camera is locked on the red-painted plane.				The ground camera films the red plane.		1
95	At a car dealer, there is a parking lot full of new cars. A surveillence camera is filming a red Ferrari sports car.				The car is a Ferrari.		1
96	A surveillence camera is mounted in a grand exhibition hall in an Egyptian museum. In its focus is a mummy with a golden mask.				The surveillance camera films a statue of a cat.		0
97	A surveillence camera is mounted in an art gallery, facing a wall full of paintings. It is filming the Van Gogh sunflower.				The surveillance camera films a Monet painting.		0
98	At a department store, there are many sweatshirts hanging on a wall. A spotlight is shining on a bright white one with golden letters.				The spotlight is shining on a suit.		0
99	A hidden microphone at a crowded party records the many conversations going on in the room. It is activated only when a specific name is mentioned.				The microphone is activated by a cat's meow.		0
100	In the desert, the sun breaks through the clouds. It shines on a small lake with palm trees around it.				The sun is shining on a lake with oak trees around it.		0
